# Supplementary material for: Inhibitory Investigations of Acyl-CoA Derivatives against Human Lipoxygenase Isozymes
Source: MDPI journal article supplement (doi:10.3390/ijms241310941), 2023-06-30
Supplement: s1 [file s1]

## **SUPPORTING INFORMATION**

### **Inhibitory Investigations of Acyl-CoA Derivatives against Human Lipoxygenase Isozymes**

Michelle Tran,<sup>1</sup> Kevin Yang<sup>1</sup>, Alisa Glukhova,<sup>2</sup> Michael Holinstat,<sup>3</sup> Theodore Holman<sup>1\*</sup>

<sup>1</sup>Department of Chemistry and Biochemistry, University of California Santa Cruz, Santa Cruz, CA 95064,  
United States

<sup>2</sup> Department of Biochemistry and Pharmacology, University of Melbourne, Melbourne, Victoria, Australia

<sup>3</sup> Department of Pharmacology, University of Michigan Medical School, Ann Arbor, MI, 48109

Funding: NIH-GM131835

**\*Corresponding Author:**

TRH: Tel.: +1-831-459-5884, holman@ucsc.edu

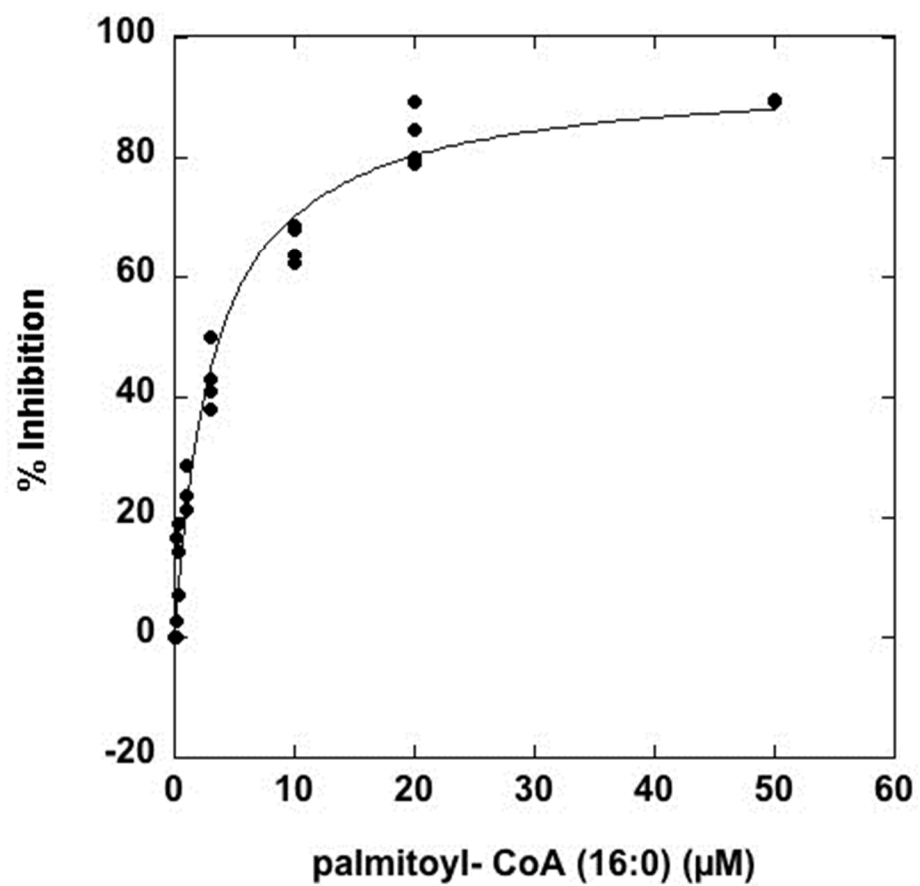

Supplemental Figure S1.  $\text{IC}_{50}$  of Palmitoyl-CoA (16:0) with h5-LOX

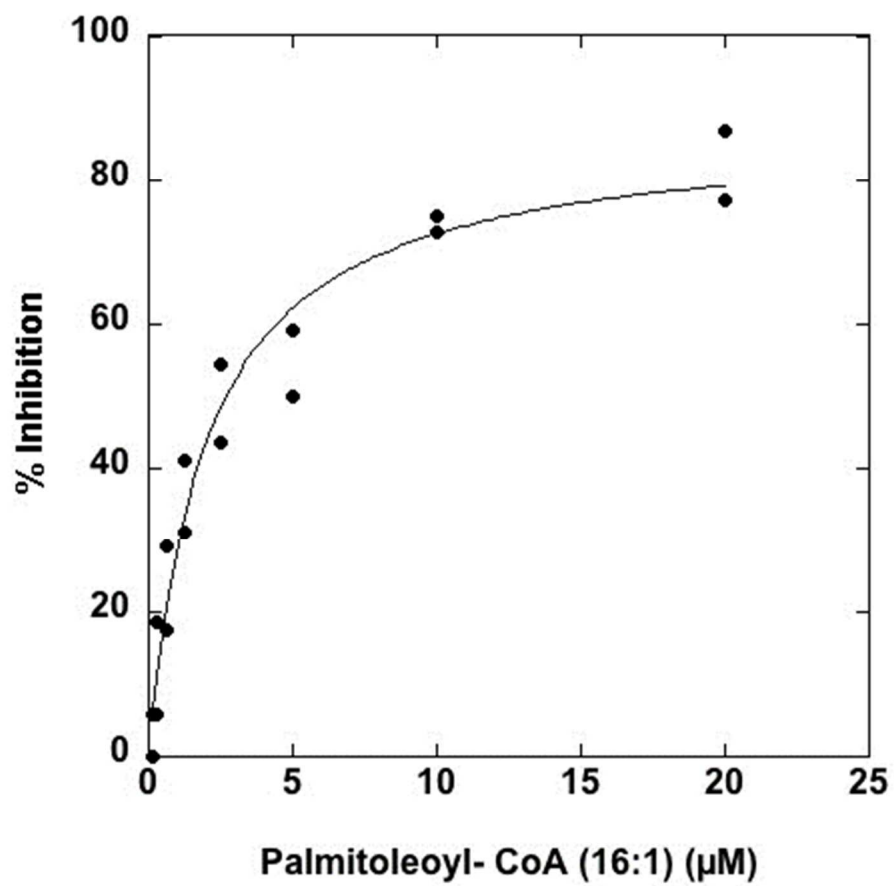

Supplemental Figure S2.  $\text{IC}_{50}$  of Palmitoleoyl-CoA (16:1) with h5-LOX

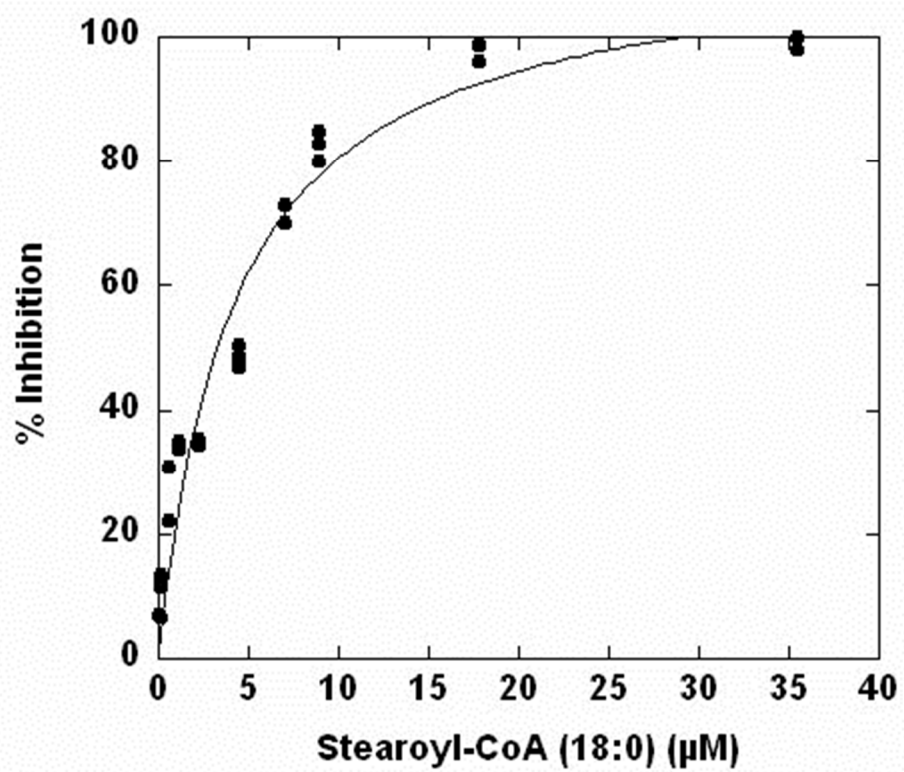

Supplemental Figure S3.  $\text{IC}_{50}$  of the h15-LOX-1 with Stearoyl-CoA (18:0)

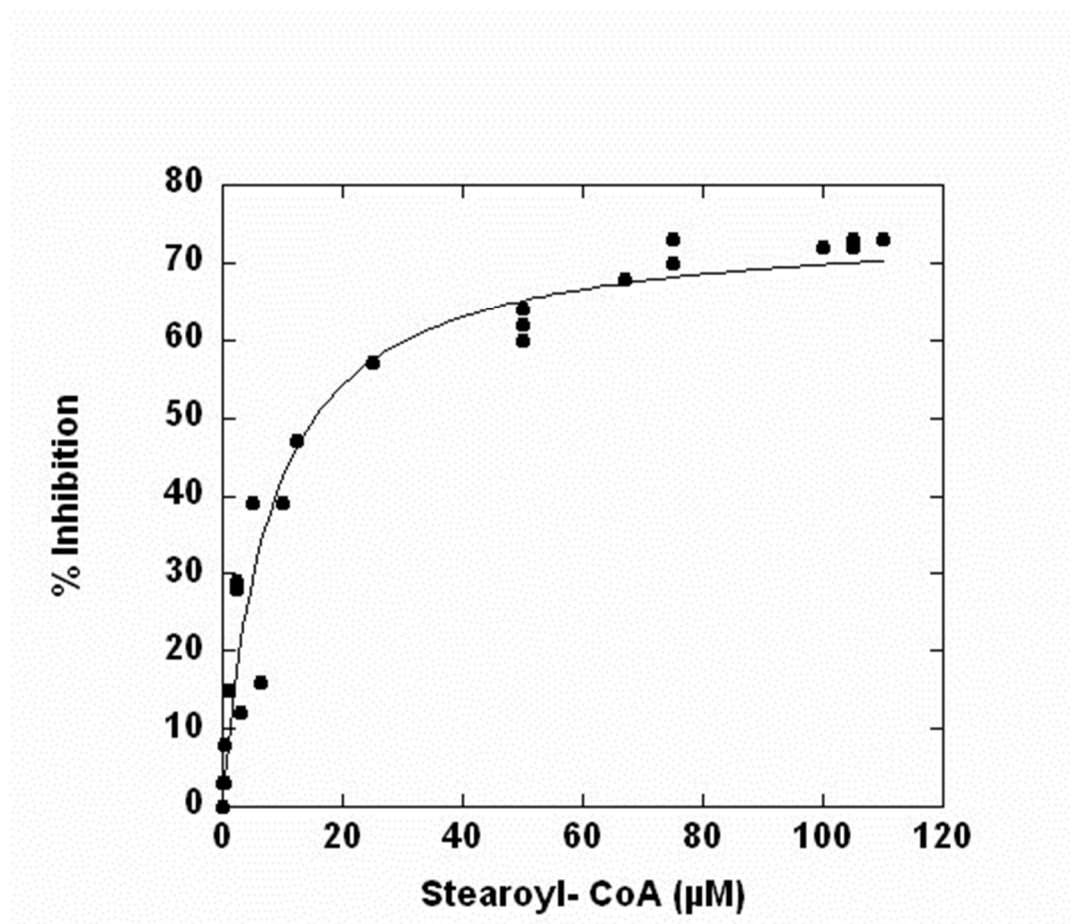

Supplemental Figure S4. IC<sub>50</sub> of h15-LOX-2 with Stearoyl-CoA(18:0)

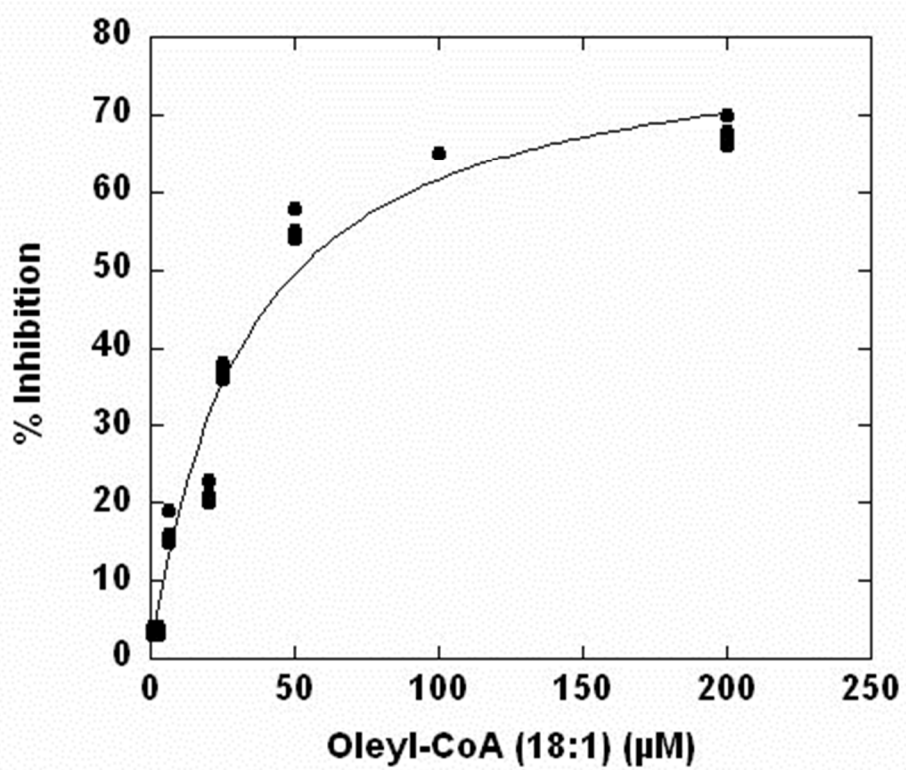

Supplemental Figure S5. IC<sub>50</sub> of the Oleyl-CoA (18:1) with h12-LOX

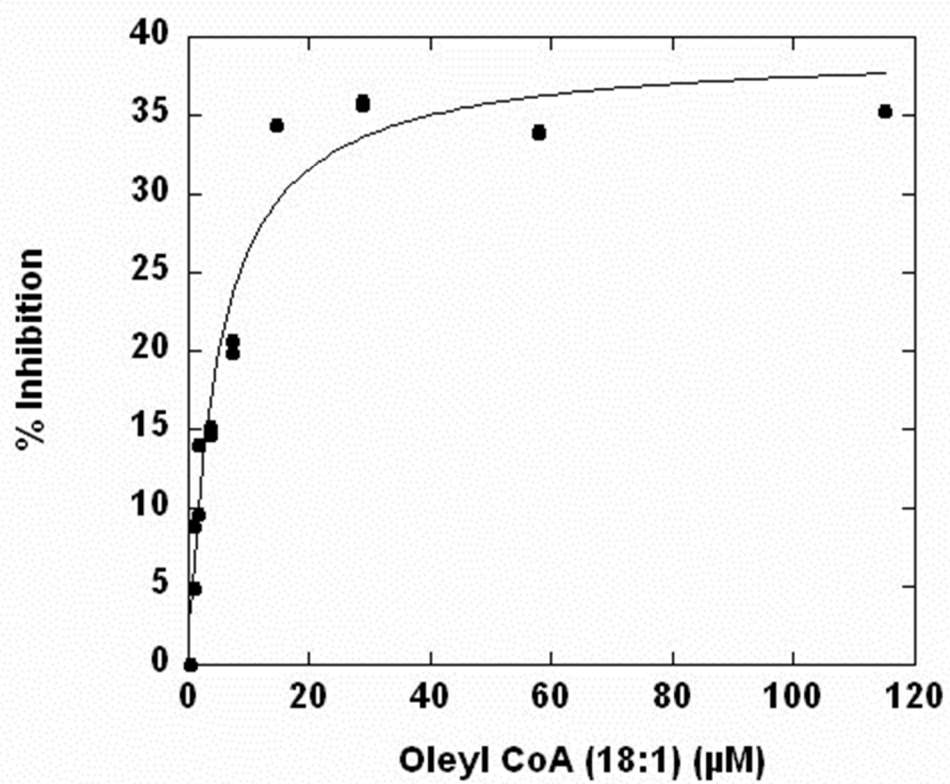

Supplemental Figure S6.  $\text{IC}_{50}$  of Oleoyl-CoA (18:1) with h15-LOX-1

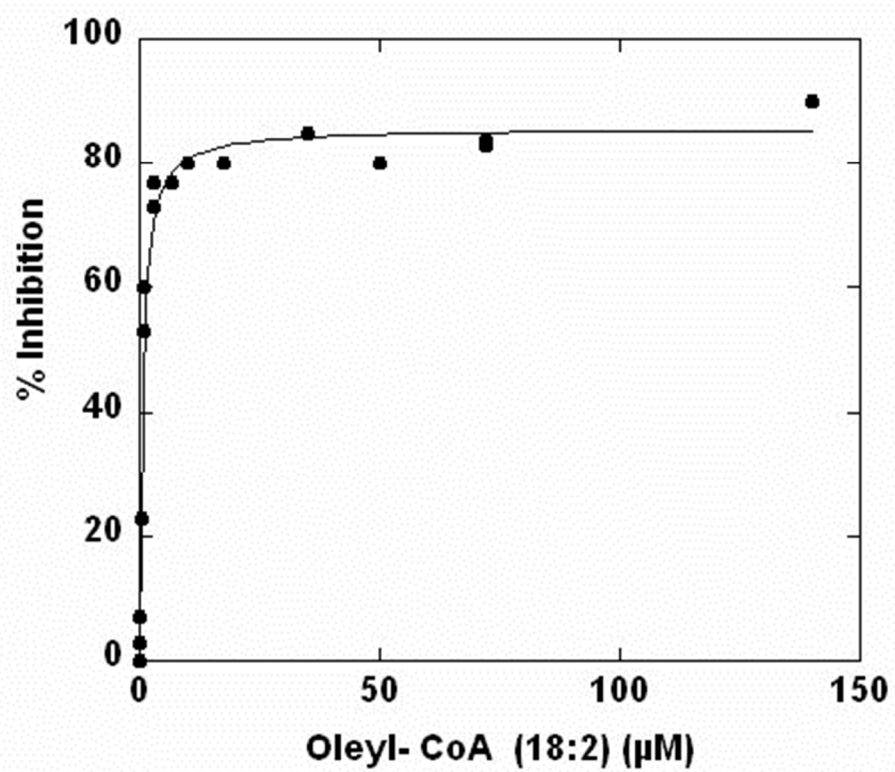

Supplemental Figure S7.  $\text{IC}_{50}$  of Oleoyl-CoA (18:1) with h15-LOX-2



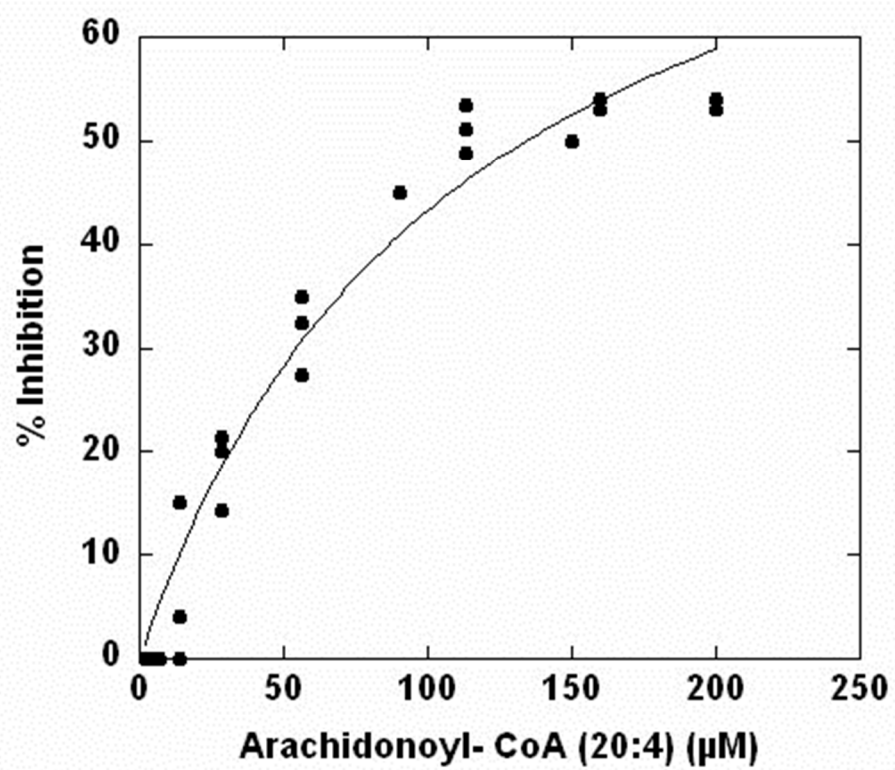

Supplemental Figure S8. IC<sub>50</sub> of Arachidonoyl-CoA (20:4) with h12-LOX
